# Supplementary material
Source: HighWire-hosted journal article supplement (https://erj.ersjournals.com/content/49/5/1601532)
Supplement: inline-supplementary-material-1 [file inline-supplementary-material-1.pdf]

## **Online Supplement - Appendix 1**

### **The development and validation of the Bronchiectasis Health Questionnaire (BHQ)**

#### **CONTENTS**

#### **Tables legends**

**Table e1.** Demographics and clinical characteristics of patients participating in interviews for item generation (n=12).

**Table e2.** Saturation table for disease-related topics mentioned by patients with bronchiectasis during interviews.

**Table e3.** Preliminary Bronchiectasis Health Questionnaire items with item elimination reasons.

**Table e4.** Demographics and clinical characteristics of patients recruited from a single centre in China.

#### **Figures legends**

**Figure e1.** Person-item threshold distribution for the Bronchiectasis Health Questionnaire (BHQ).

**Figure e2.** Bronchiectasis Health Questionnaire (BHQ) scores in patients with previous hospital admissions for bronchiectasis.

**Table e1.** Demographics and clinical characteristics of patients participating in interviews for item generation (n=12).

|                                          | <b>Interview patients</b> |
|------------------------------------------|---------------------------|
| Age, years                               | 58.0 ± 13.5               |
| Female (%)                               | 75.0                      |
| BMI kg/m <sup>2</sup>                    | 23.8 ± 3.6                |
| Smoking status %                         |                           |
| Current                                  | 0                         |
| Ex                                       | 25                        |
| Never                                    | 75                        |
| Aetiology of bronchiectasis (%)          |                           |
| Idiopathic                               | 42                        |
| Post-infective                           | 25                        |
| Disorders of ciliary function            | 17                        |
| Immunodeficiency                         | 10                        |
| Other <sup>#</sup>                       | 6                         |
| Spirometry                               |                           |
| FEV <sub>1</sub> % pred.                 | 68.0 ± 32.0               |
| FVC % pred.                              | 100.8 ± 5.8               |
| FEV <sub>1</sub> /FVC                    | 55.0 ± 24.5               |
| Sputum colonisation with micro-organisms |                           |
| <i>Pseudomonas aeruginosa</i>            | 33                        |
| Other                                    | 25                        |
| None                                     | 52                        |
| Comorbidities %                          |                           |
| Asthma                                   | 16                        |
| Rhinosinusitis                           | 25                        |
| COPD                                     | 1                         |
| Cardiovascular                           | 1                         |
| Diabetes mellitus                        | 1                         |
| Malignancy                               | 1                         |

Data presented as mean ±SD.

<sup>#</sup>: Other aetiologies consist of Kartagener's syndrome.

<sup>\$</sup>: Chronic infection status does not add up to 100% as participants could be chronically infected with *Pseudomonas aeruginosa* and other micro-organisms.

BMI: body mass index, FEV1: forced expiratory volume in the first second, FVC: forced vital capacity.

**Table e2.** Saturation table for disease-related topics mentioned by patients with bronchiectasis during interviews.

| Topic                                      | Participant ID Number |   |   |   |   |   |   |   |   |    |    |    | Total |
|--------------------------------------------|-----------------------|---|---|---|---|---|---|---|---|----|----|----|-------|
|                                            | 1                     | 2 | 3 | 4 | 5 | 6 | 7 | 8 | 9 | 10 | 11 | 12 |       |
| Feel tired                                 | 1                     | 0 | 1 | 0 | 1 | 0 | 0 | 1 | 0 | 1  | 1  | 1  | 7     |
| Short of breath                            | 1                     | 1 | 0 | 1 | 1 | 0 | 0 | 1 | 1 | 1  | 0  | 0  | 7     |
| Slower than others                         | 1                     | 1 | 1 | 0 | 1 | 0 | 0 | 1 | 0 | 1  | 0  | 0  | 6     |
| Lack of energy                             | 1                     | 0 | 1 | 0 | 1 | 0 | 0 | 1 | 0 | 1  | 0  | 1  | 6     |
| Affected ability to work, housework, other | 1                     | 0 | 1 | 1 | 0 | 1 | 0 | 0 | 1 | 0  | 1  | 0  | 6     |
| Embarrassed because of phlegm              | 1                     | 1 | 0 | 0 | 0 | 1 | 1 | 0 | 0 | 1  | 0  | 0  | 5     |
| Had antibiotics for chest infection        | 1                     | 0 | 1 | 1 | 0 | 1 | 0 | 0 | 0 | 0  | 1  | 0  | 5     |
| Difficult in planning tasks                | 1                     | 0 | 0 | 0 | 0 | 1 | 1 | 1 | 0 | 0  | 1  | 0  | 5     |
| Wheeze                                     | 1                     | 1 | 0 | 1 | 0 | 1 | 1 | 0 | 0 | 0  | 0  | 0  | 5     |
| Limits social activities                   | 1                     | 1 | 1 | 0 | 0 | 0 | 0 | 0 | 1 | 0  | 0  | 0  | 4     |
| In control of condition                    | 1                     | 0 | 0 | 1 | 0 | 0 | 0 | 0 | 1 | 0  | 1  | 0  | 4     |
| Confident in managing condition            | 1                     | 0 | 1 | 0 | 0 | 0 | 0 | 0 | 0 | 0  | 1  | 1  | 4     |
| Treatment has helped                       | 1                     | 0 | 0 | 1 | 0 | 0 | 0 | 0 | 1 | 0  | 0  | 1  | 4     |
| GP visits                                  | 1                     | 0 | 1 | 1 | 0 | 1 | 0 | 0 | 0 | 0  | 0  | 0  | 4     |
| Coughing bouts                             | 1                     | 0 | 0 | 0 | 1 | 0 | 1 | 0 | 0 | 0  | 0  | 0  | 3     |
| Phlegm most days                           | 1                     | 0 | 0 | 0 | 0 | 0 | 1 | 0 | 0 | 0  | 1  | 0  | 3     |
| Time taking treatment                      | 1                     | 0 | 0 | 1 | 0 | 0 | 1 | 0 | 0 | 0  | 0  | 0  | 3     |
| Avoided coughing up phlegm                 | 1                     | 1 | 0 | 0 | 0 | 0 | 0 | 0 | 0 | 0  | 1  | 0  | 3     |
| Tired because of cough                     | 1                     | 0 | 0 | 0 | 0 | 1 | 1 | 0 | 0 | 0  | 0  | 0  | 3     |
| Avoided public because of cough            | 1                     | 1 | 0 | 0 | 0 | 0 | 1 | 0 | 0 | 0  | 0  | 0  | 3     |
| Blocked nose                               | 1                     | 0 | 0 | 0 | 1 | 0 | 0 | 1 | 0 | 0  | 0  | 0  | 3     |
| Chest pain during cough                    | 1                     | 1 | 0 | 0 | 0 | 0 | 0 | 0 | 0 | 0  | 0  | 0  | 2     |
| Side effects from medications              | 1                     | 0 | 0 | 1 | 0 | 0 | 0 | 0 | 0 | 0  | 0  | 0  | 2     |
| Affected financially                       | 1                     | 0 | 0 | 0 | 0 | 1 | 0 | 0 | 0 | 0  | 0  | 0  | 2     |
| Fed up because of cough                    | 1                     | 0 | 0 | 0 | 0 | 0 | 1 | 0 | 0 | 0  | 0  | 0  | 2     |
| Cough interrupted conversation             | 1                     | 0 | 0 | 0 | 0 | 0 | 1 | 0 | 0 | 0  | 0  | 0  | 2     |
| Phlegm contained blood                     | 1                     | 0 | 0 | 0 | 0 | 0 | 0 | 1 | 0 | 0  | 0  | 0  | 2     |
| Difficult to cough up phlegm               | 1                     | 0 | 0 | 1 | 0 | 0 | 0 | 0 | 0 | 0  | 0  | 0  | 2     |
| Breathless during or after activities      | 0                     | 1 | 1 | 1 | 1 | 0 | 0 | 0 | 1 | 0  | 0  | 0  | 5     |
| Avoid others due to fear infection         | 0                     | 1 | 1 | 0 | 0 | 1 | 0 | 1 | 0 | 0  | 0  | 0  | 4     |
| Avoided outdoor activities                 | 0                     | 1 | 1 | 0 | 1 | 0 | 0 | 0 | 1 | 0  | 0  | 0  | 4     |
| Frustrated                                 | 0                     | 1 | 1 | 0 | 0 | 0 | 0 | 0 | 1 | 1  | 0  | 0  | 4     |

| Topic                                    | Participant ID Number |   |   |   |   |   |   |   |   |    |    |    | Total |
|------------------------------------------|-----------------------|---|---|---|---|---|---|---|---|----|----|----|-------|
|                                          | 1                     | 2 | 3 | 4 | 5 | 6 | 7 | 8 | 9 | 10 | 11 | 12 |       |
| Throat clearing                          | 0                     | 1 | 0 | 0 | 0 | 0 | 1 | 0 | 0 | 1  | 1  | 0  | 4     |
| Anxious                                  | 0                     | 1 | 0 | 0 | 0 | 1 | 0 | 1 | 0 | 0  | 0  | 0  | 3     |
| Affected enjoyment                       | 0                     | 1 | 1 | 0 | 0 | 0 | 0 | 0 | 0 | 1  | 0  | 0  | 3     |
| Avoided activity due to dyspnoea         | 0                     | 1 | 1 | 0 | 1 | 0 | 0 | 0 | 0 | 0  | 0  | 0  | 3     |
| Stopped activities                       | 0                     | 1 | 1 | 0 | 1 | 0 | 0 | 0 | 0 | 0  | 0  | 0  | 3     |
| Climbing incline or stairs               | 0                     | 1 | 0 | 0 | 0 | 0 | 1 | 0 | 1 | 0  | 0  | 0  | 3     |
| Chest feels tight                        | 0                     | 1 | 0 | 0 | 1 | 0 | 0 | 0 | 0 | 0  | 0  | 0  | 2     |
| Difficulty walking                       | 0                     | 1 | 0 | 0 | 0 | 0 | 0 | 0 | 1 | 0  | 0  | 0  | 2     |
| Difficulty in carrying things            | 0                     | 1 | 0 | 0 | 0 | 0 | 0 | 0 | 1 | 0  | 0  | 0  | 2     |
| Throat irritation                        | 0                     | 1 | 0 | 0 | 0 | 0 | 0 | 0 | 1 | 0  | 0  | 0  | 2     |
| Sleep disruption                         | 0                     | 0 | 1 | 1 | 1 | 0 | 0 | 1 | 0 | 0  | 0  | 1  | 5     |
| Embarrassed to use medications           | 0                     | 0 | 1 | 0 | 0 | 0 | 0 | 0 | 1 | 1  | 0  | 0  | 3     |
| Chest clear                              | 0                     | 0 | 0 | 1 | 0 | 0 | 0 | 0 | 1 | 0  | 0  | 1  | 3     |
| Fed up by chest physiotherapy            | 0                     | 0 | 0 | 1 | 0 | 0 | 1 | 0 | 0 | 0  | 0  | 0  | 2     |
| Medications have helped                  | 0                     | 0 | 0 | 1 | 0 | 0 | 0 | 0 | 0 | 0  | 0  | 1  | 2     |
| Admitted to hospital for chest infection | 0                     | 0 | 0 | 1 | 0 | 1 | 0 | 0 | 0 | 0  | 0  | 0  | 2     |
| Smell of phlegm                          | 0                     | 0 | 0 | 1 | 0 | 0 | 0 | 0 | 0 | 0  | 0  | 0  | 1     |
| Runny nose                               | 0                     | 0 | 0 | 0 | 1 | 0 | 0 | 1 | 0 | 0  | 0  | 1  | 3     |
| Able to control dyspnoea                 | 0                     | 0 | 0 | 0 | 1 | 0 | 0 | 1 | 0 | 0  | 0  | 0  | 2     |
| Intimacy / sex life                      | 0                     | 0 | 0 | 0 | 1 | 0 | 0 | 0 | 0 | 1  | 0  | 0  | 2     |
| Difficult to concentrate                 | 0                     | 0 | 0 | 0 | 0 | 1 | 1 | 0 | 0 | 0  | 0  | 0  | 2     |
| Depressed                                | 0                     | 0 | 0 | 0 | 0 | 1 | 0 | 0 | 0 | 1  | 0  | 0  | 2     |
| Worried bronchiectasis is getting worse  | 0                     | 0 | 0 | 0 | 0 | 1 | 0 | 0 | 0 | 0  | 0  | 0  | 1     |
| Worried about sputum colour              | 0                     | 0 | 0 | 0 | 0 | 0 | 0 | 1 | 0 | 0  | 0  | 0  | 1     |
| Vomit/sick from cough                    | 0                     | 0 | 0 | 0 | 0 | 0 | 0 | 1 | 0 | 0  | 0  | 0  | 1     |
| Affected my relationships                | 0                     | 0 | 0 | 0 | 0 | 0 | 0 | 0 | 1 | 0  | 0  | 0  | 1     |
| Worried what others think                | 0                     | 0 | 0 | 0 | 0 | 0 | 0 | 0 | 1 | 0  | 0  | 0  | 1     |

Total: number of participants who mentioned the topic.

**Table e3.** Preliminary Bronchiectasis Health Questionnaire items with item elimination reasons.

| <b>Item</b>                                                                               | <b>Reason</b> |
|-------------------------------------------------------------------------------------------|---------------|
| <b>In the last 2 weeks...</b>                                                             |               |
| 1 I have been feeling full of energy                                                      | Rasch         |
| 2 I have been tired                                                                       | BHQ           |
| 3 I have found it difficult to concentrate                                                | Rasch         |
| 4 I have been much slower at doing things than other people of my age                     | BHQ           |
| 5 I had to stop an activity                                                               | Rasch         |
| 6 I had difficulty walking outside on the level                                           | Floor         |
| 7 I have had difficulty walking up a hill, incline or stairs                              | Q8            |
| 8 I have had difficulty carrying things                                                   | Q4            |
| 9 I have limited my social activities                                                     | Q11, Q13      |
| 10 I have felt lonely                                                                     | Floor         |
| 11 I have avoided out-door activities                                                     | Floor         |
| 12 I have worried about being in close contact with others that have a cough, cold or flu | Rasch         |
| 13 My bronchiectasis has interfered with my work, housework or other daily activities     | Q9            |
| 14 My bronchiectasis has affected my sex life                                             | Missing       |
| 15 I have felt in control of my bronchiectasis                                            | Rasch         |
| 16 I have felt frustrated                                                                 | Rasch         |
| 17 I have felt anxious                                                                    | BHQ           |
| 18 I have felt depressed                                                                  | Rasch         |
| 19 I have been fed up because of my cough                                                 | Rasch         |
| 20 Cough has interrupted my conversation                                                  | Rasch         |

| <b>Item</b>                                                                    | <b>Reason</b> |
|--------------------------------------------------------------------------------|---------------|
| <b>In the last 2 weeks...</b>                                                  |               |
| 21 I have avoided a public place because of my cough                           | Floor         |
| 22 I have had to clear my throat                                               | Rasch         |
| 23 I have been annoyed by an irritation, such as a tickle or itch in my throat | Rasch         |
| 24 I have been tired because of my cough                                       | Rasch         |
| 25 I have had chest pain during coughing                                       | Floor         |
| 26 I have vomited or felt sick from coughing                                   | Floor         |
| 27 My chest has felt clear                                                     | BHQ           |
| 28 I have found it difficult to cough up phlegm (sputum)                       | Rasch         |
| 29 I have been worried about the colour of my phlegm (sputum)                  | Floor         |
| 30 I have been embarrassed because of my phlegm (sputum)                       | BHQ           |
| 31 I have avoided coughing up phlegm (sputum)                                  | Floor         |
| 32 I have had a hoarse voice                                                   | Floor         |
| 33 I have been wheezing (whistle like sounds) from my chest                    | Rasch         |
| 34 I have had a blocked nose                                                   | Rasch         |
| 35 I have had a runny nose                                                     | Rasch         |
| 36 I have felt short of breath                                                 | BHQ           |
| 37 My chest has felt tight                                                     | Rasch         |
| 38 I have avoided an activity because I did not want to feel breathless        | Rasch         |
| 39 I have been able to control my breathlessness                               | Missing       |
| 40 I have been incontinent of urine (wet my underwear) during coughing         | Floor         |
| 41 I have felt that my bronchiectasis treatments have helped me                | Ceiling       |
| 42 My bronchiectasis treatments have interfered with my daily life             | Rasch         |
| 43 I have been confident that I can manage bronchiectasis                      | Ceiling       |

| Item                                                                                                              | Reason  |
|-------------------------------------------------------------------------------------------------------------------|---------|
| <b>In the last 2 weeks...</b>                                                                                     |         |
| 44 I have been worried that my bronchiectasis is getting worse                                                    | Rasch   |
| 45 I have found it difficult to plan future activities such as holidays, engagements or appointments              | Floor   |
| 46 My sleep has been disrupted because of my bronchiectasis                                                       | BHQ     |
| 47 I have had coughing bouts                                                                                      | BHQ     |
| 48 My phlegm (sputum) contained blood                                                                             | BHQ     |
| 49 I have been breathless during or after activities                                                              | Q36     |
| 50 My bronchiectasis has adversely affected my relationship with others                                           | Floor   |
| 51 I have worried about what others think of my bronchiectasis                                                    | Floor   |
| 52 My bronchiectasis has affected my enjoyment of life                                                            | Rasch   |
| 53 My cough has annoyed people around me                                                                          | Floor   |
| 54 I have been worried about the smell of my phlegm (sputum)                                                      | Floor   |
| 55 I have been bringing up phlegm (sputum) most days                                                              | Rasch   |
| 56 I have had hearing or ear problems because of my bronchiectasis medications                                    | Floor   |
| 57 My medications (such as antibiotics, tablets, nebulisers, or inhalers) have helped my bronchiectasis           | Ceiling |
| 58 I have felt embarrassed to use my medications in front of others                                               | Floor   |
| 59 I have felt that my treatments such as physiotherapy, nebulisers or inhalers have taken up too much of my time | Rasch   |
| 60 I have had side effects from medications for my bronchiectasis                                                 | Rasch   |
| 61 I have been fed up doing chest physiotherapy                                                                   | Rasch   |

| Item                                                                     | Reason |
|--------------------------------------------------------------------------|--------|
| <b>In the last <u>1 year</u>...</b>                                      |        |
| 62 My bronchiectasis has adversely affected my finance                   | Floor  |
| 63 I have visited my General Practitioner (doctor) for my bronchiectasis | Rasch  |
| 64 I have taken courses of antibiotics for a chest infection             | BHQ    |
| 65 I have been admitted to the hospital for a chest infection            | Floor  |

Items eliminated if there were significant missing responses (n=2), floor effect (n=19), ceiling effect (n=3), significant inter-item correlations (n=5) and Rasch analysis (n=26).

BHQ: item included in the final 10-item version of the BHQ.

Q: Item with which there was a high inter-item correlation.



**Table e4.** Demographics and clinical characteristics of patients recruited from a single centre in China.

|                                          | <b>Interview patients</b> |
|------------------------------------------|---------------------------|
| Age, years                               | 55.4 ± 14.5               |
| Female (%)                               | 55.4                      |
| BMI kg/m <sup>2</sup>                    | 20.3 ± 3.5                |
| Smoking status %                         |                           |
| Current                                  | 0                         |
| Ex/never                                 | 8.9                       |
| Never                                    | 90.1                      |
| Aetiology of bronchiectasis (%)          |                           |
| Idiopathic                               | 53                        |
| Post-infective                           | 31                        |
| Immunodeficiency                         | 8                         |
| Other <sup>#</sup>                       | 8                         |
| Spirometry                               |                           |
| FEV <sub>1</sub> % pred.                 | 61.3 ± 21.1               |
| Sputum colonisation with micro-organisms |                           |
| <i>Pseudomonas aeruginosa</i>            | 32                        |
| Other                                    | 13                        |
| None                                     | 55                        |
| Exacerbations/12 months (%)              |                           |
| 0                                        | 30                        |
| 1                                        | 36                        |
| 2                                        | 14                        |
| 3                                        | 12                        |
| 4                                        | 2                         |
| 5                                        | 4                         |
| >5                                       | 2                         |
| Hospitalisations/12 months (%)           |                           |
| 0                                        | 57                        |
| 1                                        | 34                        |
| 2                                        | 5                         |
| 3                                        | 2                         |
| 4                                        | 2                         |
| 5                                        | 0                         |
| >5                                       | 0                         |

Data presented as mean ± SD.

<sup>#</sup>: Other aetiologies consist of Young's syndrome and rheumatoid arthritis.

FEV<sub>1</sub>: forced expiratory volume in the first second.

**Figure e1.** Person-item threshold distribution for the Bronchiectasis Health Questionnaire (BHQ) score.

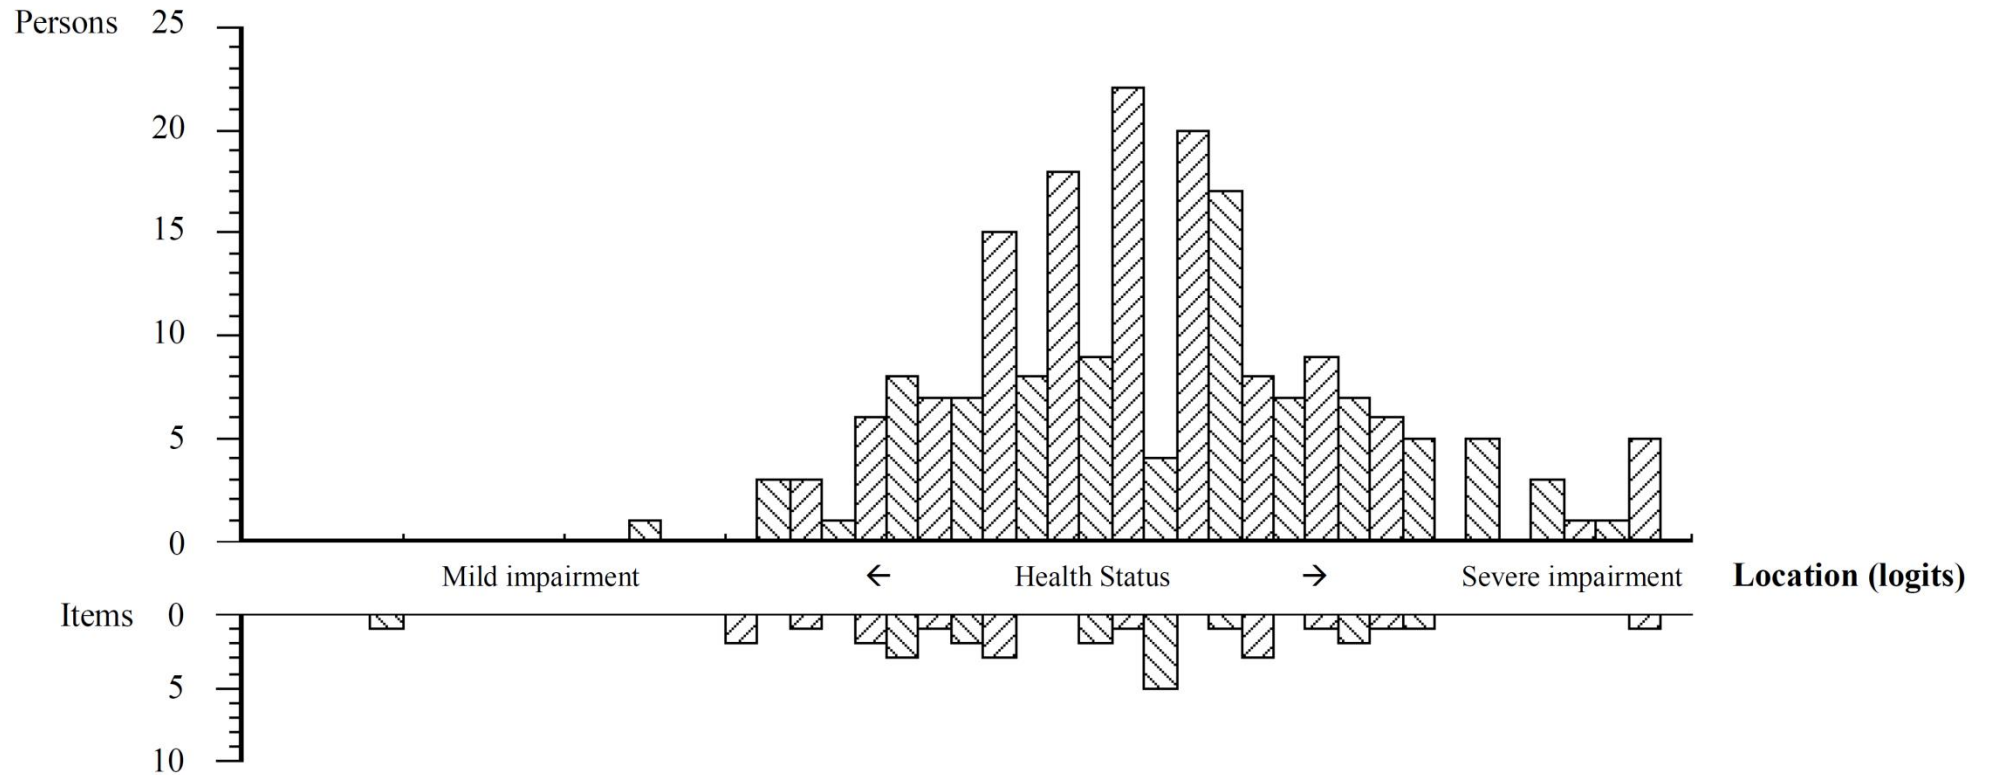

The x-axis represents severity of health status in logits (log transformed units). The item threshold frequency represents the number of item responses that measure the health status at each level of impairment. This figure demonstrates good spread of item threshold across the spectrum of health status.

**Figure e2.** Bronchiectasis Health Questionnaire (BHQ) scores in patients with previous hospital admissions for bronchiectasis.

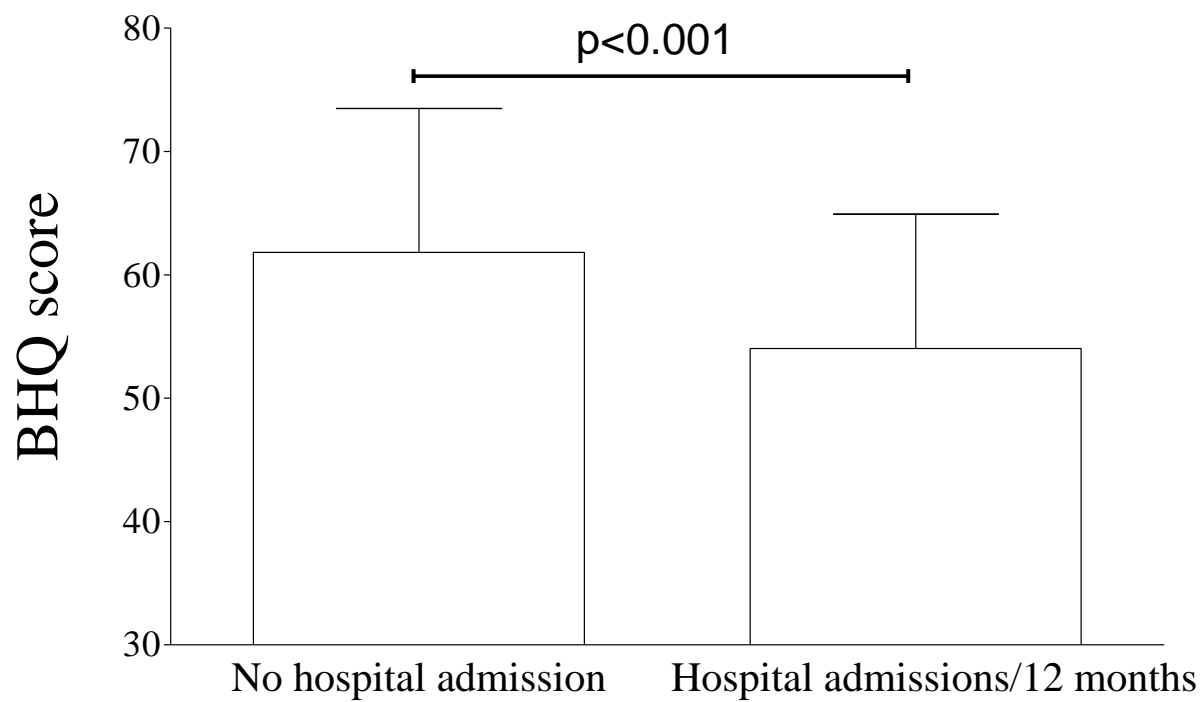

Data presented as mean (standard deviation).
