# Supplementary material
Source: HighWire-hosted journal article supplement (https://erj.ersjournals.com/content/49/5/1601532)
Supplement: inline-supplementary-material-2 [file inline-supplementary-material-2.pdf]

## Online Supplement - Appendix 2

### The development and validation of the Bronchiectasis Health Questionnaire (BHQ)

#### Translations of Bronchiectasis Health Questionnaire (BHQ)

Translations conducted by MAPI - Language Services, France, using validated methodology as per FDA Patient Reported Outcome guidelines.

| <b>CONTENTS</b>                   | <b>PAGE</b> |
|-----------------------------------|-------------|
| 1. UK-English                     | 2           |
| 2. United States-English          | 7           |
| 3. Italian (Italy)                | 12          |
| 4. United States-Spanish          | 17          |
| 5. Spanish (Spain)                | 22          |
| 6. Japanese                       | 27          |
| 7. Chinese (Simplified, Mandarin) | 32          |
| 8. French                         | 37          |
| 9. Belgium-French                 | 42          |
| 10. Belgium-Dutch                 | 47          |
| 11. Dutch (Netherlands)           | 52          |
| 12. German                        | 57          |

**UK-ENGLISH:**  
**Bronchiectasis Health Questionnaire**  
**(BHQ)**

**This questionnaire is designed to assess how bronchiectasis affects your life. Please read each question carefully and answer by SELECTING the response that best applies to you. It is important that you answer all questions as honestly as you can.**

**PATIENT INFORMATION:**

**Name .....**

**Date of Birth.....**

**Hospital ID Number.....**

**Date: .....**

- 1. In the last 14 days, I have been tired.**
  1. All of the time
  2. Most of the time
  3. A good bit of the time
  4. Some of the time
  5. A little of the time
  6. Hardly any of the time
  7. None of the time
  
- 2. In the last 14 days, I have been much slower at doing things than other people of my age.**
  1. All of the time
  2. Most of the time
  3. A good bit of the time
  4. Some of the time
  5. A little of the time
  6. Hardly any of the time
  7. None of the time
  
- 3. In the last 14 days, I have felt anxious.**
  1. All of the time
  2. Most of the time
  3. A good bit of the time
  4. Some of the time
  5. A little of the time
  6. Hardly any of the time
  7. None of the time

**4. In the last 14 days, my chest has felt clear.**

1. All of the time
2. Most of the time
3. A good bit of the time
4. Some of the time
5. A little of the time
6. Hardly any of the time
7. None of the time

**5. In the last 14 days, I have been embarrassed because of my phlegm (sputum).**

1. All of the time
2. Most of the time
3. A good bit of the time
4. Some of the time
5. A little of the time
6. Hardly any of the time
7. None of the time

**6. In the last 14 days, I have felt short of breath.**

1. All of the time
2. Most of the time
3. A good bit of the time
4. Some of the time
5. A little of the time
6. Hardly any of the time
7. None of the time

**7. In the last 14 days, my sleep has been disrupted because of my bronchiectasis.**

1. Every night
2. Most nights
3. Several nights
4. Some nights
5. Occasionally
6. Rarely
7. Never

**8. In the last 14 days, I have had coughing bouts.**

1. Every day
2. Most days
3. Several days
4. Some days
5. Occasionally
6. Rarely
7. Never

**9. In the last 14 days, my phlegm (sputum) contained blood.**

1. Every time
2. Most times
3. Several times
4. Sometimes
5. Occasionally
6. Rarely
7. Never

**10. In the last 12 months, I have taken courses of antibiotics for a chest infection.**

1. More than five times
2. Five times
3. Four times
4. Three times
5. Twice
6. Once
7. None

**Thank you for completing this questionnaire!**

# **US-ENGLISH: Bronchiectasis Health Questionnaire (BHQ)**

**This questionnaire is designed to assess how bronchiectasis affects your life. Please read each question carefully and answer by SELECTING the response that best applies to you. It is important that you answer all questions as honestly as you can.**

## **PATIENT INFORMATION:**

**Name .....**

**Date of Birth .....**

**Hospital ID Number.....**

**Date .....**

- 1. In the last 14 days, I have been tired.**
  1. All of the time
  2. Most of the time
  3. A good bit of the time
  4. Some of the time
  5. A little of the time
  6. Hardly any of the time
  7. None of the time
  
- 2. In the last 14 days, I have been much slower at doing things than other people of my age.**
  1. All of the time
  2. Most of the time
  3. A good bit of the time
  4. Some of the time
  5. A little of the time
  6. Hardly any of the time
  7. None of the time
  
- 3. In the last 14 days, I have felt anxious.**
  1. All of the time
  2. Most of the time
  3. A good bit of the time
  4. Some of the time
  5. A little of the time
  6. Hardly any of the time
  7. None of the time



**4. In the last 14 days, my chest has felt clear.**

1. All of the time
2. Most of the time
3. A good bit of the time
4. Some of the time
5. A little of the time
6. Hardly any of the time
7. None of the time

**5. In the last 14 days, I have been embarrassed because of my phlegm (sputum).**

1. All of the time
2. Most of the time
3. A good bit of the time
4. Some of the time
5. A little of the time
6. Hardly any of the time
7. None of the time

**6. In the last 14 days, I have felt short of breath.**

1. All of the time
2. Most of the time
3. A good bit of the time
4. Some of the time
5. A little of the time
6. Hardly any of the time
7. None of the time

**7. In the last 14 days, my sleep has been disrupted because of my bronchiectasis.**

1. Every night
2. Most nights
3. Several nights
4. Some nights
5. Occasionally
6. Rarely
7. Never

**8. In the last 14 days, I have had coughing fits.**

1. Every day
2. Most days
3. Several days
4. Some days
5. Occasionally
6. Rarely
7. Never

**9. In the last 14 days, my phlegm (sputum) contained blood.**

1. Every time
2. Most times
3. Several times
4. Sometimes
5. Occasionally
6. Rarely
7. Never

**10. In the last 12 months, I have taken antibiotic treatments for a chest infection.**

1. More than five times
2. Five times
3. Four times
4. Three times
5. Twice
6. Once
7. None

**Thank you for completing this questionnaire!**

# **ITALIAN: Questionario sanitario sulla bronchiectasia (BHQ)**

**Il presente questionario è stato sviluppato allo scopo di valutare in che modo la bronchiectasia influenzi la Sua vita.**

**La invitiamo a leggere ogni domanda attentamente e a rispondere SELEZIONANDO la risposta che si applica meglio a Lei. È importante che risponda a ciascuna domanda il più onestamente possibile.**

## **INFORMAZIONI SUL PAZIENTE:**

**Nome .....**

**Data di nascita .....**

**Numero ID ospedale.....**

**Data.....**

- 1. Nel corso delle ultime 2 settimane mi sono sentito/a stanco/a.**
  1. Sempre
  2. Quasi sempre
  3. Molto tempo
  4. Per un certo tempo
  5. Poco tempo
  6. Quasi mai
  7. Mai
  
- 2. Nel corso delle ultime 2 settimane sono stato/a molto più lento/a nello svolgere le cose rispetto alle altre persone della mia età.**
  1. Sempre
  2. Quasi sempre
  3. Molto tempo
  4. Per un certo tempo
  5. Poco tempo
  6. Quasi mai
  7. Mai
  
- 3. Nel corso delle ultime 2 settimane mi sono sentito/a ansioso/a.**
  1. Sempre
  2. Quasi sempre
  3. Molto tempo
  4. Per un certo tempo
  5. Poco tempo
  6. Quasi mai
  7. Mai

- 4. Nel corso delle ultime 2 settimane ho sentito il petto libero dal muco.**
1. Sempre
  2. Quasi sempre
  3. Molto tempo
  4. Per un certo tempo
  5. Poco tempo
  6. Quasi mai
  7. Mai
- 5. Nel corso delle ultime 2 settimane mi sono sentito/a imbarazzato/a a causa del muco (espettorato).**
1. Sempre
  2. Quasi sempre
  3. Molto tempo
  4. Per un certo tempo
  5. Poco tempo
  6. Quasi mai
  7. Mai
- 6. Nel corso delle ultime 2 settimane ho sentito di avere il fiato corto.**
1. Sempre
  2. Quasi sempre
  3. Molto tempo
  4. Per un certo tempo
  5. Poco tempo
  6. Quasi mai
  7. Mai

**7. Nel corso delle ultime 2 settimane il mio sonno è stato disturbato a causa delle mie bronchiectasie.**

1. Tutte le notti
2. La maggior parte delle notti
3. Diverse notti
4. Alcune notti
5. Occasionalmente
6. Raramente
7. Mai

**8. Nel corso delle ultime 2 settimane ho avuto attacchi di tosse.**

1. Ogni giorno
2. La maggior parte dei giorni
3. Diversi giorni
4. Alcuni giorni
5. Occasionalmente
6. Raramente
7. Mai

**9. Nel corso delle ultime 2 settimane il mio muco (espettorato) conteneva sangue.**

1. Ogni volta
2. La maggior parte delle volte
3. Diverse volte
4. Qualche volta
5. Occasionalmente
6. Raramente
7. Mai

**10. Nell'ULTIMO ANNO ho intrapreso cure di antibiotici a causa di un'infezione respiratoria.**

1. Più di cinque volte
2. Cinque volte
3. Quattro volte
4. Tre volte
5. Due volte
6. Una volta
7. Mai

**Grazie per aver compilato il questionario.**



# **US-SPANISH: Cuestionario de salud sobre bronquiectasia (BHQ)**

**Este cuestionario está diseñado para evaluar cómo la bronquiectasia afecta su vida.**

**Por favor, lea detenidamente cada pregunta y responda SELECCIONANDO la respuesta que mejor le corresponda. Es importante que usted responda a todas las preguntas lo más honestamente que pueda.**

## **INFORMACIÓN DEL/DE LA PACIENTE:**

**Nombre.....**

**Fecha de nacimiento.....**

**Número de identificación del hospital.....**

**Fecha.....**

**1. En los últimos 14 días, he estado cansado(a).**

1. Siempre
2. La mayoría del tiempo
3. Buena parte del tiempo
4. Parte del tiempo
5. Algunas veces
6. Casi nunca
7. Nunca

**2. En los últimos 14 días, he sido mucho más lento(a) que otras personas de mi edad al hacer cosas.**

1. Siempre
2. La mayoría del tiempo
3. Buena parte del tiempo
4. Parte del tiempo
5. Algunas veces
6. Casi nunca
7. Nunca

**3. En los últimos 14 días, me he sentido ansioso(a).**

1. Siempre
2. La mayoría del tiempo
3. Buena parte del tiempo
4. Parte del tiempo
5. Algunas veces
6. Casi nunca
7. Nunca

**4. En los últimos 14 días, me he sentido sin flemas.**

1. Siempre
2. La mayoría del tiempo
3. Buena parte del tiempo
4. Parte del tiempo
5. Algunas veces
6. Casi nunca
7. Nunca

**5. En los últimos 14 días, me he sentido avergonzado(a) debido a mi flema.**

1. Siempre
2. La mayoría del tiempo
3. Buena parte del tiempo
4. Parte del tiempo
5. Algunas veces
6. Casi nunca
7. Nunca

**6. En los últimos 14 días, sentí que me faltaba el aire.**

1. Siempre
2. La mayoría del tiempo
3. Buena parte del tiempo
4. Parte del tiempo
5. Algunas veces
6. Casi nunca
7. Nunca

**7. En los últimos 14 días, mi sueño se ha visto alterado debido a mi bronquiectasia.**

1. Todas las noches
2. La mayoría de las noches
3. Bastantes noches
4. Algunas noches
5. Ocasionalmente
6. Rara vez
7. Nunca

**8. En los últimos 14 días, he tenido ataques de tos.**

1. Todos los días
2. La mayoría de los días
3. Bastantes días
4. Algunos días
5. Ocasionalmente
6. Rara vez
7. Nunca

**9. En los últimos 14 días, mi flema contenía sangre.**

1. Siempre
2. La mayoría de las veces
3. Bastantes veces
4. Algunas veces
5. Ocasionalmente
6. Rara vez
7. Nunca

**10. En el ÚLTIMO AÑO, he tomado tratamientos de antibióticos para una infección respiratoria.**

1. Más de cinco veces
2. Cinco veces
3. Cuatro veces
4. Tres veces
5. Dos veces
6. Una vez
7. Nunca

**¡Gracias por contestar este cuestionario!**

# **ES-SPANISH: Cuestionario de salud sobre la bronquiectasia (BHQ)**

**Este cuestionario se ha diseñado para evaluar de qué modo afecta a su vida la bronquiectasia.**

**Lea atentamente cada pregunta y responda SELECCIONANDO la respuesta que mejor describa su caso. Es importante que conteste todas las preguntas con sinceridad.**

## **INFORMACIÓN DEL PACIENTE:**

**Nombre .....**

**Fecha de nacimiento.....**

**Número de identificación del hospital.....**

**Fecha.....**

**1. En los últimos 14 días he estado cansado/a.**

1. Todo el tiempo
2. La mayor parte del tiempo
3. Buena parte del tiempo
4. Parte del tiempo
5. Alguna vez
6. Casi nunca
7. Nunca

**2. En los últimos 14 días he hecho las cosas mucho más despacio que otras personas de mi edad.**

1. Todo el tiempo
2. La mayor parte del tiempo
3. Buena parte del tiempo
4. Parte del tiempo
5. Alguna vez
6. Casi nunca
7. Nunca

**3. En los últimos 14 días he estado preocupado/a.**

1. Todo el tiempo
2. La mayor parte del tiempo
3. Buena parte del tiempo
4. Parte del tiempo
5. Alguna vez
6. Casi nunca
7. Nunca

**4. En los últimos 14 días me he sentido sin flemas.**

1. Todo el tiempo
2. La mayor parte del tiempo
3. Buena parte del tiempo
4. Parte del tiempo
5. Alguna vez
6. Casi nunca
7. Nunca

**5. En los últimos 14 días he sentido vergüenza a causa de las flemas (esputos) que tenía.**

1. Todo el tiempo
2. La mayor parte del tiempo
3. Buena parte del tiempo
4. Parte del tiempo
5. Alguna vez
6. Casi nunca
7. Nunca

**6. En los últimos 14 días me ha faltado el aire.**

1. Todo el tiempo
2. La mayor parte del tiempo
3. Buena parte del tiempo
4. Parte del tiempo
5. Alguna vez
6. Casi nunca
7. Nunca



- 7. En los últimos 14 días he tenido problemas para dormir a causa de las bronquiectasias.**
1. Todas las noches
  2. La mayoría de las noches
  3. Bastantes noches
  4. Algunas noches
  5. De vez en cuando
  6. Muy pocas veces
  7. Nunca
- 8. En los últimos 14 días he tenido ataques de tos.**
1. Todos los días
  2. La mayoría de los días
  3. Bastantes días
  4. Algunos días
  5. De vez en cuando
  6. Muy pocas veces
  7. Nunca
- 9. En los últimos 14 días las flemas (esputos) que expulsaba tenían sangre.**
1. Todas las veces
  2. La mayoría de las veces
  3. Bastantes veces
  4. Algunas veces
  5. De vez en cuando
  6. Muy pocas veces
  7. Nunca

**10. En el ÚLTIMO AÑO, he tomado tratamientos con antibióticos para infecciones respiratorias.**

1. Más de cinco veces
2. Cinco veces
3. Cuatro veces
4. Tres veces
5. Dos veces
6. Una vez
7. En ninguna ocasión

**Muchas gracias por haber respondido a este cuestionario.**

# JAPANESE: 気管支拡張症健康質問票

## (BHQ)

この質問票は、気管支拡張症があなたの生活にどのように影響するかを評価するためのものです。

各質問を慎重にお読みいただき、ご自身に最も当てはまると思われる答えを選択してください。全ての質問に、できるかぎり正直にお答えいただくことが重要です。

### 患者様の情報：

名前 .....

生年月日 .....

患者 I D 番号 .....

日付 .....

1. この2週間、疲れを感じた。

1. いつも
2. ほとんどいつも
3. たびたび
4. 時々
5. 少し
6. ほとんどない
7. 全くない

2. この2週間、同年代の人と比較して自分の動作がかなり遅かった。

1. いつも
2. ほとんどいつも
3. たびたび
4. 時々
5. 少し
6. ほとんどない
7. 全くない

3. この2週間、不安を感じた。

1. いつも
2. ほとんどいつも
3. たびたび
4. 時々
5. 少し
6. ほとんどない
7. 全くない

4. この2週間、胸がすっきりしていた。

1. いつも
2. ほとんどいつも
3. たびたび
4. 時々
5. 少し
6. ほとんどない
7. 全くない

5. この2週間、痰（喀痰）のために困った。

1. いつも
2. ほとんどいつも
3. たびたび
4. 時々
5. 少し
6. ほとんどない
7. 全くない

6. この2週間、息切れを感じた。

1. いつも
2. ほとんどいつも
3. たびたび
4. 時々
5. 少し
6. ほとんどない
7. 全くない

7. この2週間、気管支拡張症のせいで睡眠が妨げられた。

1. 毎晩
2. ほとんど毎晩
3. 数日の夜
4. 2, 3日の夜
5. たまに
6. めったにない
7. まったくない

8. この2週間、咳の発作があった。

1. 毎日
2. ほとんど毎日
3. 数日
4. 2, 3日
5. たまに
6. めったにない
7. まったくない

9. この2週間、痰（喀痰）に血が混じっていた。

1. 毎回
2. ほとんど毎回
3. 数回
4. 2, 3回
5. たまに
6. めったにない
7. まったくない

10. この1年間、呼吸器感染症のために抗生物質を服用することがあった。

1. 6回以上
2. 5回
3. 4回
4. 3回
5. 2回
6. 1回
7. まったくない

質問票にお答えいただきありがとうございました！

# CHINESE (Simplified, Mandarin): 支气管扩张患者健康问卷(BHQ)

本问卷的目的是评估支气管扩张对您生活的影响。

请仔细阅读每一个问题，并选择那个最适合您的答案。尽可能真实地回答每一问题非常重要。

## 患者信息:

姓名 .....

出生日期.....

医院ID号 .....

日期.....



1. 在过去2周中，我感到累。
  1. 所有时间
  2. 大部分时间
  3. 很多时间
  4. 一些时间
  5. 一点时间
  6. 几乎没有时间
  7. 从来没有
  
2. 在过去2周中，我做事情比其他同龄人要慢得多。
  1. 所有时间
  2. 大部分时间
  3. 很多时间
  4. 一些时间
  5. 一点时间
  6. 几乎没有时间
  7. 从来没有
  
3. 在过去2周中，我感到焦虑。
  1. 所有时间
  2. 大部分时间
  3. 很多时间
  4. 一些时间
  5. 一点时间
  6. 几乎没有时间
  7. 从来没有

**4. 在过去2周中，我感到胸部清爽（不堵塞）。**

1. 所有时间
2. 大部分时间
3. 很多时间
4. 一些时间
5. 一点时间
6. 几乎没有时间
7. 从来没有

**5. 在过去2周中，我因为咳痰而感到尴尬。**

1. 所有时间
2. 大部分时间
3. 很多时间
4. 一些时间
5. 一点时间
6. 几乎没有时间
7. 从来没有

**6. 在过去2周中，我感到气短。**

1. 所有时间
2. 大部分时间
3. 很多时间
4. 一些时间
5. 一点时间
6. 几乎没有时间
7. 从来没有

**7. 在过去2周中，由于我的支气管扩张，我的睡眠被扰乱。**

1. 每个晚上
2. 大多数晚上
3. 多个晚上
4. 有些晚上
5. 偶尔
6. 很少
7. 从来没有

**8. 在过去2周中，我出现咳嗽发作。**

1. 每天
2. 大多数天
3. 许多天
4. 有些天
5. 偶尔
6. 很少
7. 从来没有

**9. 在过去2周中，我的痰液中带血。**

1. 每次
2. 大部分次数
3. 好几次
4. 有时
5. 偶尔
6. 很少
7. 从来没有

10. 在过去一年中，我因为呼吸道感染而接受了抗生素治疗。

1. 超过五次
2. 五次
3. 四次
4. 三次
5. 两次
6. 一次
7. 完全没有

感谢您填写本问卷！

# **FRANCE-FRENCH : Questionnaire sur la bronchectasie (BHQ)**

Ce questionnaire est destiné à évaluer la manière dont la bronchectasie affecte votre vie.

Veillez lire attentivement chaque question et répondre en CHOISSANT la réponse correspondant le mieux à votre situation. Il est important que vous répondiez aussi honnêtement que possible à chaque question.

## **INFORMATIONS SUR LE PATIENT :**

Nom .....

Date de naissance .....

Identifiant du patient .....

Date .....

- 1. Au cours des 14 derniers jours, j'ai ressenti de la fatigue.**
  1. Tout le temps
  2. Presque tout le temps
  3. Souvent
  4. Parfois
  5. Rarement
  6. Presque jamais
  7. Jamais
  
- 2. Au cours des 14 derniers jours, il m'a fallu plus de temps pour faire les choses que les gens de mon âge.**
  1. Tout le temps
  2. Presque tout le temps
  3. Souvent
  4. Parfois
  5. Rarement
  6. Presque jamais
  7. Jamais
  
- 3. Au cours des 14 derniers jours, j'ai ressenti de l'anxiété.**
  1. Tout le temps
  2. Presque tout le temps
  3. Souvent
  4. Parfois
  5. Rarement
  6. Presque jamais
  7. Jamais

**4. Au cours des 14 derniers jours, j'ai eu l'impression que mes poumons étaient dégagés.**

1. Tout le temps
2. Presque tout le temps
3. Souvent
4. Parfois
5. Rarement
6. Presque jamais
7. Jamais

**5. Au cours des 14 derniers jours, les expectorations (crachats) m'ont mis(e) mal à l'aise.**

1. Tout le temps
2. Presque tout le temps
3. Souvent
4. Parfois
5. Rarement
6. Presque jamais
7. Jamais

**6. Au cours des 14 derniers jours, je me suis senti(e) essoufflé(e).**

1. Tout le temps
2. Presque tout le temps
3. Souvent
4. Parfois
5. Rarement
6. Presque jamais
7. Jamais

- 7. Au cours des 14 derniers jours, ma bronchectasie a perturbé mon sommeil.**
1. Toutes les nuits
  2. Presque toutes les nuits
  3. Plusieurs nuits
  4. Quelques nuits
  5. Occasionnellement
  6. Rarement
  7. Jamais
- 8. Au cours des 14 derniers jours, j'ai eu des quintes de toux.**
1. Tous les jours
  2. Presque tous les jours
  3. Plusieurs jours
  4. Quelques jours
  5. Occasionnellement
  6. Rarement
  7. Jamais
- 9. Au cours des 14 derniers jours, mes expectorations (crachats) contenaient du sang.**
1. Tout le temps
  2. Presque tout le temps
  3. Souvent
  4. Parfois
  5. Occasionnellement
  6. Rarement
  7. Jamais



**10. Au cours des 12 derniers mois, j'ai suivi des traitements antibiotiques pour une infection pulmonaire.**

1. Plus de cinq fois
2. Cinq fois
3. Quatre fois
4. Trois fois
5. Deux fois
6. Une fois
7. Jamais

**Merci d'avoir répondu à ce questionnaire.**

# **BELGIUM-FRENCH: Questionnaire** **sur la bronchectasie (BHQ)**

Ce questionnaire est destiné à évaluer la manière dont la bronchectasie affecte votre vie.

Veillez lire attentivement chaque question et répondre en **CHOISSISSANT** la réponse correspondant le mieux à votre situation. Il est important que vous répondiez aussi honnêtement que possible à chaque question.

## **INFORMATIONS SUR LE PATIENT :**

Nom .....

Date de naissance .....

Identifiant du patient .....

Date.....

- 1. Au cours des 14 derniers jours, j'ai ressenti de la fatigue.**
  1. Tout le temps
  2. Presque tout le temps
  3. Souvent
  4. Parfois
  5. Rarement
  6. Presque jamais
  7. Jamais
  
- 2. Au cours des 14 derniers jours, il m'a fallu plus de temps pour faire les choses que la plupart des gens de mon âge.**
  1. Tout le temps
  2. Presque tout le temps
  3. Souvent
  4. Parfois
  5. Rarement
  6. Presque jamais
  7. Jamais
  
- 3. Au cours des 14 derniers jours, j'ai ressenti de l'anxiété.**
  1. Tout le temps
  2. Presque tout le temps
  3. Souvent
  4. Parfois
  5. Rarement
  6. Presque jamais
  7. Jamais

**4. Au cours des 14 derniers jours, j'ai eu l'impression que mes poumons étaient dégagés.**

1. Tout le temps
2. Presque tout le temps
3. Souvent
4. Parfois
5. Rarement
6. Presque jamais
7. Jamais

**5. Au cours des 14 derniers jours, les expectorations (crachats) m'ont mis(e) mal à l'aise.**

1. Tout le temps
2. Presque tout le temps
3. Souvent
4. Parfois
5. Rarement
6. Presque jamais
7. Jamais

**6. Au cours des 14 derniers jours, je me suis senti(e) essoufflé(e).**

1. Tout le temps
2. Presque tout le temps
3. Souvent
4. Parfois
5. Rarement
6. Presque jamais
7. Jamais

- 7. Au cours des 14 derniers jours, ma bronchectasie a perturbé mon sommeil.**
1. Toutes les nuits
  2. Presque toutes les nuits
  3. Plusieurs nuits
  4. Quelques nuits
  5. Occasionnellement
  6. Rarement
  7. Jamais
- 8. Au cours des 14 derniers jours, j'ai eu des quintes de toux.**
1. Tous les jours
  2. Presque tous les jours
  3. Plusieurs jours
  4. Quelques jours
  5. Occasionnellement
  6. Rarement
  7. Jamais
- 9. Au cours des 14 derniers jours, mes expectorations (crachats) contenaient du sang.**
1. Tout le temps
  2. Presque tout le temps
  3. Souvent
  4. Parfois
  5. Occasionnellement
  6. Rarement
  7. Jamais

**10. Au cours des 12 derniers mois, j'ai suivi des traitements antibiotiques pour une infection pulmonaire.**

1. Plus de cinq fois
2. Cinq fois
3. Quatre fois
4. Trois fois
5. Deux fois
6. Une fois
7. Jamais

**Merci d'avoir répondu à ce questionnaire.**

# **BELGIUM-DUTCH:** **Gezondheidsvragenlijst** **bronchiëctasieën (BHQ)**

Deze vragenlijst is bedoeld om na te gaan hoe bronchiëctasieën uw leven beïnvloeden.

Lees elke vraag eerst zorgvuldig en **SELECTEER** daarna het antwoord dat het meest op u van toepassing is. Het is belangrijk dat u alle vragen zo eerlijk mogelijk beantwoordt.

## **PATIËNTENINFORMATIE:**

**Naam** .....

**Geboortedatum**.....

**ID-nummer ziekenhuis** .....

**Datum** .....

**1. De afgelopen 14 dagen was ik moe.**

1. Altijd
2. Meestal
3. Vrij vaak
4. Soms
5. Weinig
6. Bijna nooit
7. Geen enkele keer

**2. De afgelopen 14 dagen deed ik de dingen veel langzamer dan andere mensen van mijn leeftijd.**

1. Altijd
2. Meestal
3. Vrij vaak
4. Soms
5. Weinig
6. Bijna nooit
7. Geen enkele keer

**3. De afgelopen 14 dagen voelde ik me angstig.**

1. Altijd
2. Meestal
3. Vrij vaak
4. Soms
5. Weinig
6. Bijna nooit
7. Geen enkele keer



**4. De afgelopen 14 dagen waren mijn longen vrij van slijm (sputum).**

1. Altijd
2. Meestal
3. Vrij vaak
4. Soms
5. Weinig
6. Bijna nooit
7. Geen enkele keer

**5. De afgelopen 14 dagen schaamde ik me voor het slijm (sputum) dat ik ophoestte.**

1. Altijd
2. Meestal
3. Vrij vaak
4. Soms
5. Weinig
6. Bijna nooit
7. Geen enkele keer

**6. De afgelopen 14 dagen had ik last van kortademigheid.**

1. Altijd
2. Meestal
3. Vrij vaak
4. Soms
5. Weinig
6. Bijna nooit
7. Geen enkele keer

**7. De afgelopen 14 dagen kon ik niet goed slapen door mijn bronchiëctasieën.**

1. Elke nacht
2. Bijna elke nacht
3. Meerdere nachten
4. Een aantal nachten
5. Af en toe
6. Zelden
7. Nooit

**8. De afgelopen 14 dagen had ik last van hoestbuien.**

1. Elke dag
2. Bijna elke dag
3. Meerdere dagen
4. Een paar dagen
5. Af en toe
6. Zelden
7. Nooit

**9. De afgelopen 14 dagen zat er bloed in mijn slijm (sputum).**

1. Elke keer
2. De meeste keren
3. Meerdere keren
4. Soms
5. Af en toe
6. Zelden
7. Nooit

**10. In het afgelopen jaar heb ik antibiotica gekregen voor een longinfectie.**

1. Meer dan vijf keer
2. Vijf keer
3. Vier keer
4. Drie keer
5. Twee keer
6. Een keer
7. Helemaal niet

**Hartelijk dank voor het invullen van deze vragenlijst!**

# **NL-DUTCH: Gezondheidsvragenlijst bronchiëctasieën (BHQ)**

Deze vragenlijst is bedoeld om na te gaan hoe bronchiëctasieën uw leven beïnvloeden.

Lees elke vraag eerst zorgvuldig en **SELECTEER** daarna het antwoord dat het meest op u van toepassing is. Het is belangrijk dat u alle vragen zo eerlijk mogelijk beantwoordt.

## **PATIËNTENINFORMATIE:**

**Naam** .....

**Geboortedatum** .....

**ID-nummer ziekenhuis** .....

**Datum** .....

**1. De afgelopen 14 dagen was ik moe.**

1. Altijd
2. Meestal
3. Vrij vaak
4. Soms
5. Weinig
6. Bijna nooit
7. Geen enkele keer

**2. De afgelopen 14 dagen deed ik de dingen veel langzamer dan andere mensen van mijn leeftijd.**

1. Altijd
2. Meestal
3. Vrij vaak
4. Soms
5. Weinig
6. Bijna nooit
7. Geen enkele keer

**3. De afgelopen 14 dagen voelde ik me angstig.**

1. Altijd
2. Meestal
3. Vrij vaak
4. Soms
5. Weinig
6. Bijna nooit
7. Geen enkele keer

**4. De afgelopen 14 dagen waren mijn longen vrij van slijm (sputum).**

1. Altijd
2. Meestal
3. Vrij vaak
4. Soms
5. Weinig
6. Bijna nooit
7. Geen enkele keer

**5. De afgelopen 14 dagen schaamde ik me voor het slijm (sputum) dat ik ophoestte.**

1. Altijd
2. Meestal
3. Vrij vaak
4. Soms
5. Weinig
6. Bijna nooit
7. Geen enkele keer

**6. De afgelopen 14 dagen had ik last van kortademigheid.**

1. Altijd
2. Meestal
3. Vrij vaak
4. Soms
5. Weinig
6. Bijna nooit
7. Geen enkele keer

**7. De afgelopen 14 dagen kon ik niet goed slapen door mijn bronchiëctasieën.**

1. Elke nacht
2. Bijna elke nacht
3. Meerdere nachten
4. Een aantal nachten
5. Af en toe
6. Zelden
7. Nooit

**8. De afgelopen 14 dagen had ik last van hoestbuien.**

1. Elke dag
2. Bijna elke dag
3. Meerdere dagen
4. Een paar dagen
5. Af en toe
6. Zelden
7. Nooit

**9. De afgelopen 14 dagen zat er bloed in mijn slijm (sputum).**

1. Elke keer
2. De meeste keren
3. Meerdere keren
4. Soms
5. Af en toe
6. Zelden
7. Nooit

**10. In het afgelopen jaar heb ik antibiotica gekregen voor een longinfectie.**

1. Meer dan vijf keer
2. Vijf keer
3. Vier keer
4. Drie keer
5. Twee keer
6. Een keer
7. Helemaal niet

**Hartelijk dank voor het invullen van deze vragenlijst!**



# **DE-GERMAN: Gesundheitsfragebogen zu Bronchiektasen (BHQ)**

**Mit diesem Fragebogen soll beurteilt werden, welche Auswirkungen die Bronchiektasen auf Ihr Leben haben.**

**Bitte lesen Sie jede Frage sorgfältig durch und WÄHLEN Sie die Antwort aus, die am besten auf Sie zutrifft. Dabei ist es wichtig, dass Sie alle Fragen so ehrlich wie möglich beantworten.**

## **ANGABEN ZUM PATIENTEN/ZUR PATIENTIN:**

**Name .....**

**Geburtsdatum.....**

**Patientenkennnummer .....**

**Datum.....**

**1. In den letzten 14 Tagen war ich müde.**

1. Immer
2. Meistens
3. Oft
4. Hin und wieder
5. Selten
6. Fast nie
7. Nie

**2. In den letzten 14 Tagen war ich bei meinen Tätigkeiten viel langsamer als andere in meinem Alter.**

1. Immer
2. Meistens
3. Oft
4. Hin und wieder
5. Selten
6. Fast nie
7. Nie

**3. In den letzten 14 Tagen hatte ich Angstgefühle.**

1. Immer
2. Meistens
3. Oft
4. Hin und wieder
5. Selten
6. Fast nie
7. Nie

**4. In den letzten 14 Tagen haben sich meine Atemwege frei angefühlt.**

1. Immer
2. Meistens
3. Oft
4. Hin und wieder
5. Selten
6. Fast nie
7. Nie

**5. In den letzten 14 Tagen habe ich mich wegen meines Auswurfs geschämt.**

1. Immer
2. Meistens
3. Oft
4. Hin und wieder
5. Selten
6. Fast nie
7. Nie

**6. In den letzten 14 Tagen habe ich mich kurzatmig gefühlt.**

1. Immer
2. Meistens
3. Oft
4. Hin und wieder
5. Selten
6. Fast nie
7. Nie

**7. In den letzten 14 Tagen hatte ich Schlafstörungen aufgrund meiner Bronchiektasen.**

1. Jede Nacht
2. Die meisten Nächte
3. Viele Nächte
4. Einige Nächte
5. Manchmal
6. Selten
7. Nie

**8. In den letzten 14 Tagen hatte ich Hustenanfälle.**

1. Jeden Tag
2. An den meisten Tagen
3. An vielen Tagen
4. An einigen Tagen
5. Manchmal
6. Selten
7. Nie

**9. In den letzten 14 Tagen war mein Auswurf blutig.**

1. Jedes Mal
2. Meistens
3. Häufig
4. Einige Male
5. Manchmal
6. Selten
7. Nie

**10. Im LETZTEN JAHR habe ich wegen einer Atemwegsinfektion Antibiotika erhalten.**

1. Mehr als fünfmal
2. Fünfmal
3. Viermal
4. Dreimal
5. Zweimal
6. Einmal
7. Überhaupt nicht

**Vielen Dank für das Ausfüllen dieses Fragebogens.**
